# Supplementary material
Source: PubMed Central journal article supplement (PMC9976951)
Supplement: NIHMS1837258-supplement-1.pdf [file NIHMS1837258-supplement-1.pdf]

**Supplemental Table 3. Systemic inflammatory biomarkers.**

| Mediator                       | Control (pg/ml)   | <i>F. alocis</i> infection (pg/ml) | Smoke exposure (pg/ml) | <i>F. alocis</i> infection and Smoke exposure (pg/ml) |
|--------------------------------|-------------------|------------------------------------|------------------------|-------------------------------------------------------|
| <b>G-CSF</b>                   | <b>207 (55)</b>   | <b>191 (60)</b>                    | <b>216 (63)</b>        | <b>163 (47)</b>                                       |
| <b>IL-1<math>\alpha</math></b> | <b>1202 (285)</b> | <b>1475 (155)</b>                  | <b>1565 (405)</b>      | <b>1577 (251)</b>                                     |
| <b>IL-5</b>                    | <b>8 (2)</b>      | <b>9 (7)</b>                       | <b>16 (21)</b>         | <b>30 (56)</b>                                        |
| <b>IL-12</b>                   | <b>11 (16)</b>    | <b>6 (6)</b>                       | <b>13 (28)</b>         | <b>3 (4)</b>                                          |
| <b>IL-13</b>                   | <b>28 (8)</b>     | <b>25 (8)</b>                      | <b>24 (14)</b>         | <b>25 (9)</b>                                         |
| <b>IL-15</b>                   | <b>80 (147)</b>   | <b>58 (119)</b>                    | <b>60 (104)</b>        | <b>14 (37)</b>                                        |
| <b>IL-17</b>                   | <b>3 (4)</b>      | <b>6 (5)</b>                       | <b>6 (5)</b>           | <b>10 (10)</b>                                        |
| <b>IP-10</b>                   | <b>297 (61)</b>   | <b>437 (58)</b>                    | <b>520 (178)</b>       | <b>661 (85)**</b>                                     |
| <b>KC</b>                      | <b>50 (46)</b>    | <b>68 (40)</b>                     | <b>38 (53)</b>         | <b>71 (28)</b>                                        |
| <b>MCP-1</b>                   | <b>15 (19)</b>    | <b>25 (33)</b>                     | <b>12 (20)</b>         | <b>49 (97)</b>                                        |
| <b>MIP1<math>\alpha</math></b> | <b>23 (21)</b>    | <b>12 (20)</b>                     | <b>26 (51)</b>         | <b>26 (26)</b>                                        |
| <b>MIP1<math>\beta</math></b>  | <b>84 (15)</b>    | <b>74 (37)</b>                     | <b>63 (34)</b>         | <b>75 (11)</b>                                        |
| <b>MIP2</b>                    | <b>221 (112)</b>  | <b>222 (18)</b>                    | <b>250 (181)</b>       | <b>221 (13)</b>                                       |
| <b>RANTES</b>                  | <b>23 (17)</b>    | <b>16 (6)</b>                      | <b>35 (57)</b>         | <b>31 (49)</b>                                        |
| <b>TNF</b>                     | <b>4 (4)</b>      | <b>9 (8)</b>                       | <b>1 (3)</b>           | <b>11 (27)</b>                                        |

Data represent mean (s.d.) values.

Inflammation-related biomarkers were measured in serum collected at euthanization from mice infected with *F. alocis* or sham infected and exposed to ambient air or tobacco smoke for 3 hours per day over 15 days by multiplexing.

\*\*  $p < 0.01$ , compared to control group.
