# Supplementary material
Source: PubMed Central journal article supplement (PMC9976951)
Supplement: NIHMS1837258-supplement-AppendixS1.pdf [file NIHMS1837258-supplement-AppendixS1.pdf]

## Supplemental materials

### Materials

*F. alocis* ATCC 35896 was purchased from the American Type Culture Collection (Manassas, VA). Brain-heart infusion broth (BHI) was purchased from Difco Laboratories Inc (Detroit, MI). Yeast extract, L-cysteine, arginine, carboxymethyl cellulose, 2-mercaptoethanol, and murine IgG standards were purchased from Sigma Aldrich Corporation (St. Louis, MO, USA). PBS was purchased from Life Technologies (Grand Island, NY, USA). 1R6F Research Cigarettes were from the Kentucky Tobacco Research & Development Center (Lexington, KY). RNeasy mini kits and RNase-free DNase sets were from Qiagen Sciences (Germantown, MD). Lysing Matrix B came from MP Bio (Solon, OH). The Teague TE-10C cigarette smoking machine was from Teague Enterprises (Davis, CA). Balb/c mice were purchased from The Jackson Laboratories (Bar Harbor, ME). Oral gavage needles were obtained from Cadence Science Inc (Cranston, RI, USA). Cotton swabs 25-800 D 50 were purchased from Puritan Medical Products Co (Guilford, ME, USA). Kidde 21008873 CO monitors and K&H Products small animal heating pads were from [www.amazon.com](http://www.amazon.com). Pallflex membrane filters for collecting particulate matter, type EMFAB TX40H120-WW, came from Pall Life Sciences (Fajardo, Puerto Rico). LOOK SP114 non-adsorbent black braided Silk 6.0 was from Surgical Specialties (Braintree, MA). Ketamine was from Henry Schein, Inc (Indianapolis, IN). The DT-811 infrared thermometer was purchased from Kent Scientific Corp (Torrington, CT). Dexdomitor (dexmedetomidine hydrochloride) was provided by the University of Louisville animal facilities. Mouse/rat cotinine ELISAs were bought from Calbiotech (El Cajon, CA). Methylene blue and eosin were purchased from Ricca Chemical Company (Batesville, IN). 12B double edged curved scalpel blades were from Integra Miltex (York, PA). OCT media was purchased from Tissue-Tek (Torrance, CA). Normal goat serum was from Vector Laboratories, Inc (Burlingame, CA, USA). BSA and sucrose were from Fisher Scientific (Waltham, MA, USA), as was the NanoDrop One system. ReliaPrep gDNA tissue miniprep systems were from Promega (Madison, WI). Power SYBR green 2x Master Mix and H&E stains were from Applied Biosystems (Waltham, MA). Immunocal decalcifier was purchased from StatLab Medical Products (McKinney, TX). Primers for qPCR were purchased from Integrated DNA Technologies (San Diego, CA). *gyrB* gene forward primer: 5'-ACC CTC AAG TTG CCA AAA TTA TTA T-3' and reverse primer: 5'-TAC TCC CTT TCT TCT GGT TAA ATC T-3'. 16s RNA (UD16s) gene forward primer: 5' -GTG STG CAY GGY TGT CGT CA-3' and reverse primer: 5-ACG TCR TCC MCA CCT TCC TC-3'. HRP-linked mouse anti-IgG and -IgM antibodies were from Cell Signaling Technologies (Danvers, MA) and Bethyl Laboratories (Montgomery, TX), respectively. TMB ELISA Substrate Solution was bought from eBioScience (San

Diego, CA). Cytokine/chemokine magnetic beads and murine IgG standards were purchased from Millipore Sigma (St. Louis, MO). Taqman primers for housekeeping genes (GAPDH, 18s) and inflammatory markers (MIP-2 (CXCL2), IL-1 $\beta$ , IL-17 $\alpha$ , MMP-9, MMP-8, CD45, CD14, IL-10, IL-6, TIMP1) came from ThermoFisher Scientific (Waltham, MA).
