# Supplementary material
Source: PubMed Central journal article supplement (PMC9976951)

# Supplemental Figure 1

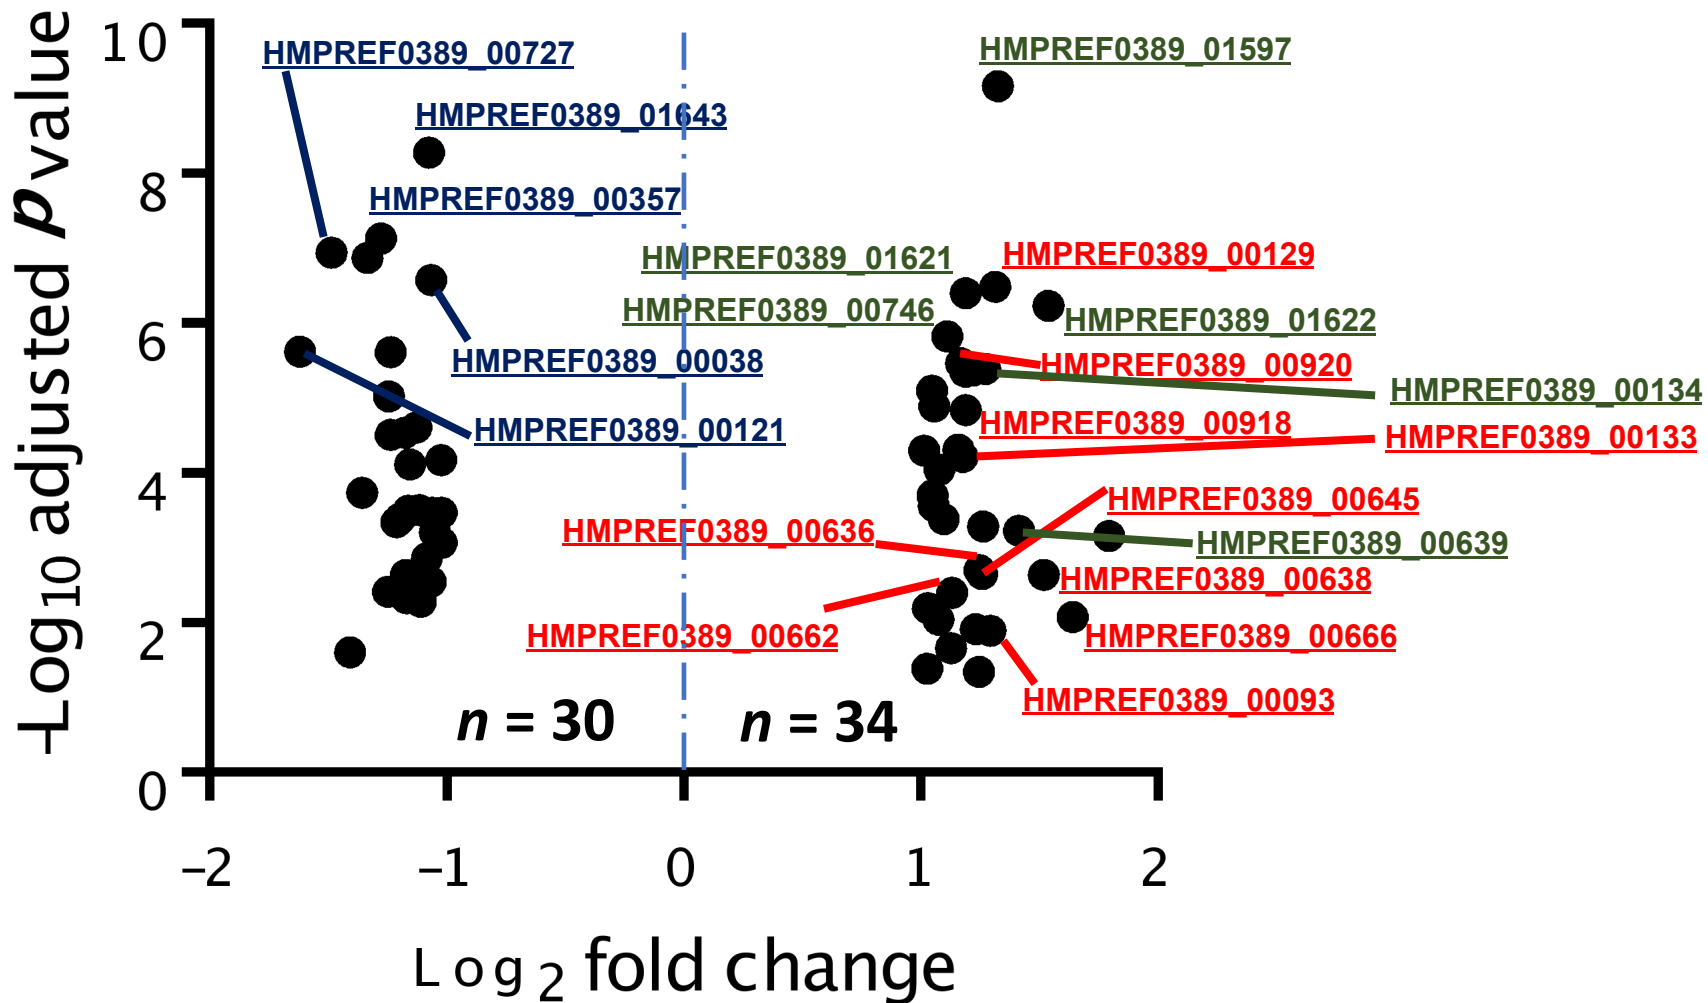

Supplement: NIHMS1837258-supplement-Figure_S1.pdf [file NIHMS1837258-supplement-Figure_S1.pdf]
